# Supplementary material
Source: Springer Nature journal article supplement (https://www.springermedizin.de/resource/supplementary/12974_2004_3_MOESM1_ESM.pdf/9600018)

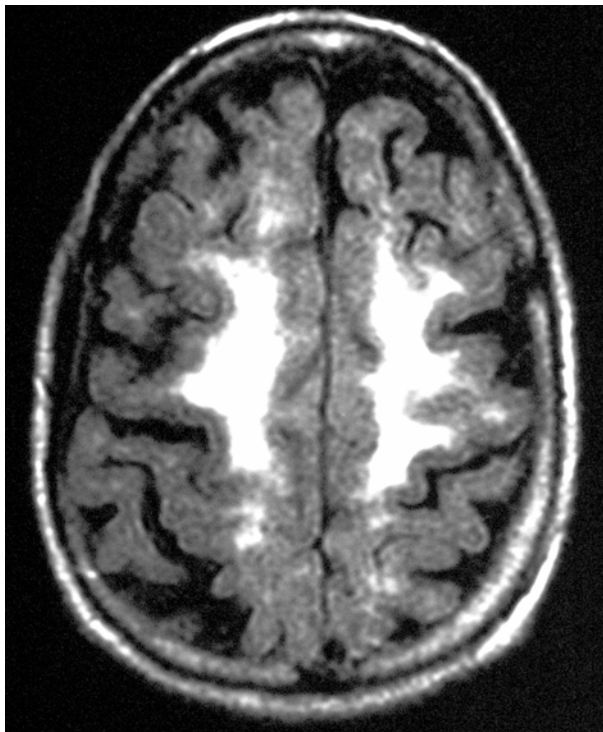

10 months

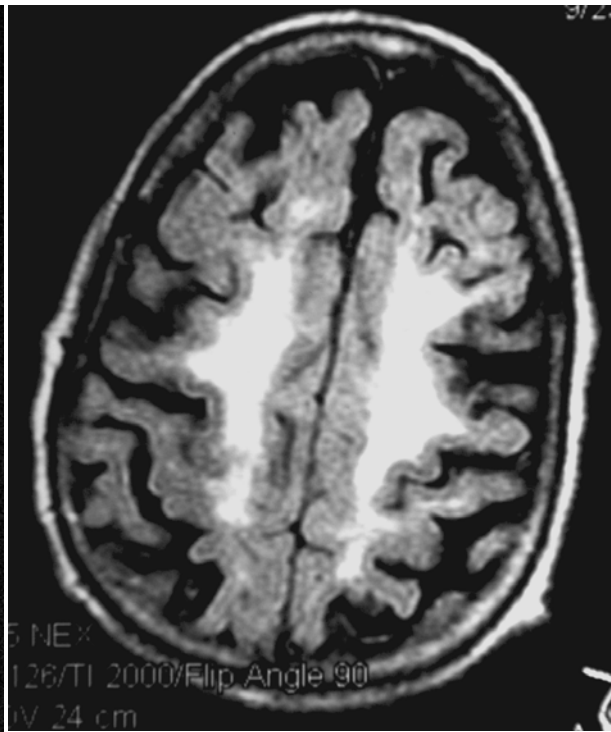

18 months

Supplement: MOESM1 [file 9600018]
